# Supplementary material
Source: ML conference proceedings conference paper supplement (https://proceedings.mlr.press/v97/beatson19a.html)
Supplement: Supplementary file 1 [file beatson19a-supp.pdf]

## A. Algorithm pseudocode

---

### Algorithm 1 Optimization with randomized telescopes

---

**Input:** initial parameter  $\theta$ , gradient routine  $g(\theta, i)$  which returns  $\bar{G}_i(\theta)$ , compute costs  $\bar{C}$ , exponential decay  $\alpha$ , tuning frequency  $K$ , horizon  $\bar{H}$ , reference learning rate  $\bar{\eta}$

Initialize  $B = 0$ , next\_tune = 0,  $D_{i,j} = 0$

**repeat**

**if** next\_tune  $\leq$   $B$  **then**

$\bar{D}, q, W, S \leftarrow \text{tune}(\theta, \bar{D}, g, \bar{C}, \alpha, \bar{H})$

    expectedCompute, expectedSquaredNorm = compute\_and\_variance( $\bar{D}, \bar{C}, S$ )

$\eta \leftarrow \bar{\eta} \frac{\text{expectedSquaredNorm}}{D_{0,\bar{H}}}$

$B+ = \sum_{i=1}^{\bar{H}} \bar{C}(\bar{H})$

    next\_tune  $+$  =  $\bar{C}(\bar{H})$

**end if**

$N \sim q$

**for**  $n = 1$  **to**  $N$  **do**

$G_n \leftarrow g(\theta, S[n])$

**end for**

$\hat{G} \leftarrow \sum_{n=1}^N G_n W(n, N)$

$\theta \leftarrow \theta - \eta \hat{G}$

**if** compute reused **then**

$B+ = \bar{C}(S[N])$

**else**

$B+ = \sum_{n=1}^N \bar{C}(S[n])$

**end if**

**until** converged

---



---

### Algorithm 2 tune

---

**Input:** current parameter  $\theta$ , current squared distance estimates  $\bar{D}_{i,j}$ , gradient routine  $g(\theta, i)$  which returns  $\bar{G}_i(\theta)$ , compute costs  $\bar{C}$ , exponential decay  $\alpha$ , horizon  $\bar{H}$

$\bar{G}_0(\theta) \leftarrow 0$

**for**  $i = 1$  **to**  $\bar{H}$  **do**

$\bar{G}_i(\theta) \leftarrow g(\theta, i)$

**end for**

**for**  $i = 0$  **to**  $\bar{H}$  **do**

**for**  $j = 1$  **to**  $\bar{H}$  **do**

$D_{i,j} \leftarrow \|G_i - G_j\|_2^2$

**end for**

**end for**

$\bar{D} \leftarrow \alpha \bar{D} + (1 - \alpha) D$

$S \leftarrow \text{greedy\_subsequence\_select}(\bar{D}, \bar{C})$

$q, W \leftarrow q\_and\_W(\bar{D}, \bar{C}, S)$

**Return:** updated estimates  $\bar{D}_{i,j}$ , sampling distribution  $q$ , weight function  $W$ , and subsequence  $S$

---

**Algorithm 3** greedy\_subsequence\_select

---

**Input:** Norm estimates  $\bar{D}$ , compute costs  $\bar{C}$   
Initialize  $N = \text{len}(C)$   
Initialize  $S^+ = [N]$ ,  $S^- = [1, \dots, N]$ , converged=FALSE, bestAddCost=cost( $\bar{D}$ ,  $S^+$ ,  $\bar{C}$ ),  
bestRemoveCost=cost( $\bar{D}$ ,  $S^-$ ,  $\bar{C}$ )  
**while** not converged **do**

**for**  $i \in [i \text{ for } i \in [1 \dots N] \text{ if not } i \in S^+]$  **do**  
trialS  $\leftarrow$  sort( $S^+ + [i]$ )  
trialCost  $\leftarrow$  cost( $\bar{D}$ ,  $\bar{C}$ , trialS)  
**if** trialCost < bestAddCost **then**  
 $S^+ \leftarrow$  trialS  
bestAddCost  $\leftarrow$  trialCost  
converged  $\leftarrow$  False  
BREAK  
**else**  
converged  $\leftarrow$  True  
**end if**  
**end for**

**end while**  
converged  $\leftarrow$  False  
**while** not converged **do**

**for**  $i \in [i \text{ for } i \in S^- \text{ if } i \neq N]$  **do**  
trialS  $\leftarrow [j \text{ for } j \in S^- \text{ if } j \neq i]$   
trialCost  $\leftarrow$  sequence\_cost( $\bar{D}$ ,  $\bar{C}$ , trialS)  
**if** trialCost < bestRemoveCost **then**  
 $S^- \leftarrow$  trialS  
bestRemoveCost  $\leftarrow$  trialCost  
converged  $\leftarrow$  False  
BREAK  
**else**  
converged  $\leftarrow$  True  
**end if**  
**end for**

**end while**  
**if** bestRemoveCost > bestAddCost **then**  
**Return:**  $S^-$   
**else**  
**Return:**  $S^+$   
**end if**

---

**Algorithm 4** compute\_and\_variance

---

**Input:** Norm estimates  $\bar{D}$ , compute costs  $\bar{C}$ , sequence  $S$   
 $q, W \leftarrow q\_and\_W(\bar{D}, \bar{C}, S)$   
 $expectedCompute \leftarrow \sum_{i \in [1 \dots |S|]} q(S[i]) \bar{C}(S[i])$   
**if** RT-SS **then**  
 $expectedSquaredNorm \leftarrow \sum_{i \in [1 \dots |S|]} q(S[i]) W(S[i], S[i]) \bar{D}_{S[i-1], S[i]}$   
**else if** RT-RR **then**  
 $expectedSquaredNorm \leftarrow \sum_{i \in [1 \dots |S|]} \sum_{j \in [1 \dots i]} q(S[i]) W(S[j], S[i]) \bar{D}_{S[j], S[i]}$   
**else**  
 Undefined: must specify RT-SS or RT-RR  
**end if**  
**Return:**  $expectedCompute, expectedSquaredNorm$

---

**Algorithm 5** sequence\_cost

---

**Input:** Norm estimates  $\bar{D}$ , compute costs  $\bar{C}$ , sequence  $S$   
 $expectedCompute, expectedSquaredNorm = compute\_and\_variance(\bar{D}, \bar{C}, S)$   
**Return:**  $expectedCompute * expectedSquaredNorm$

---

**Algorithm 6**  $q\_and\_W$

---

**Input:**  $\bar{D}, \bar{C}$ , and  $S$   
**if** RT-SS **then**  
 $q(N) \leftarrow \sqrt{\frac{\bar{D}_{S[N], S[N-1]}}{\bar{C}(S[n])}}$   
 $W(n, N) \leftarrow \frac{1}{q(N)} \mathbb{1}\{n = N\}$   
**else if** RT-RR **then**  
 $\tilde{Q}(N) \leftarrow \sqrt{\frac{\bar{D}_{S[N], S[N-1]}}{\bar{C}(S[n]) - \bar{C}(S[n-1])}}$   
 $\tilde{q}(N) \leftarrow \max(0, \tilde{Q}(N) - \tilde{Q}(N-1))$   
 $q(N) \leftarrow \frac{\tilde{q}(N)}{\sum_i \tilde{q}(i)}$   
 $W(n, N) \leftarrow \frac{1}{1 - \sum_i q(i)} \mathbb{1}\{n \leq N\}$   
**else**  
 Undefined: must specify RT-SS or RT-RR  
**end if**  
**Return:**  $q, W$

---

## B. Proofs

### B.1. Proofs for section 2

#### B.1.1. PROPOSITION 2.1

**Unbiasedness of RT estimators.** The RT estimators in (2) are unbiased estimators of  $Y_H$  as long as

$$\mathbb{E}_{N \sim q}[W(n, N)\mathbb{1}\{N \geq n\}] = \sum_{N=n}^H W(n, N)q(N) = 1 \quad \forall n.$$

*Proof.* A randomized telescope estimator which satisfies the above linear constraint condition has expectation:

$$\begin{aligned} \mathbb{E}[\hat{Y}_H] &= \sum_{N=1}^H q(N) \sum_{n=1}^N W(n, N)\Delta_n \\ &= \sum_{n=1}^H \sum_{N=1}^H \Delta_n W(n, N)q(N)\mathbb{1}\{n \leq N\} \\ &= \sum_{n=1}^H \Delta_n \sum_{N=n}^H W(n, N)q(N) = \sum_{n=1}^H \Delta_n = Y_H \end{aligned}$$

□

### B.2. Proofs for section 4

#### B.2.1. THEOREM 4.1

**Bounded variance and compute with polynomial convergence of  $\psi$ .** Assume  $\psi$  converges according to  $\psi_n \leq \frac{c}{(n)^p}$  or faster, for constants  $p > 0$  and  $c > 0$ . Choose the RT-SS estimator with  $q(n) \propto 1/((n)^{p+1/2})$ . The resulting estimator  $\hat{G}$  achieves expected compute  $C \leq (\mathcal{H}_H^{p-\frac{1}{2}})^2$ , where  $\mathcal{H}_H^i$  is the  $H$ th generalized harmonic number of order  $i$ , and expected squared norm  $\mathbb{E}[|\hat{G}|_2^2] \leq c_\psi^2 (\mathcal{H}_H^{p-\frac{1}{2}})^2 := \tilde{G}^2$ . The limit  $\lim_{H \rightarrow \infty} \mathcal{H}_H^{p-\frac{1}{2}}$  is finite iff  $p > \frac{3}{2}$ , in which case it is given by the Riemannian zeta function,  $\lim_{H \rightarrow \infty} \mathcal{H}_H^{p-\frac{1}{2}} = \zeta(p - \frac{1}{2})$ . Accordingly, the estimator achieves horizon-agnostic variance and expected compute bounds iff  $p > \frac{3}{2}$ .

*Proof.* Begin by noting the RT-SS estimator returns  $\frac{\Delta_n}{q_n}$  with probability  $q(n)$ . Let  $\bar{q}(n) = \frac{1}{n^{p+\frac{1}{2}}}$  and  $\sum_{n=1}^H \bar{q}(n) = Z$ ,

such that  $q(n) = \frac{\bar{q}(n)}{Z}$ . First, note  $Z = \sum_{n=1}^H \frac{1}{n^{p+\frac{1}{2}}} = \mathbf{H}_H^{p+\frac{1}{2}}$ . Now inspect the expected squared norm  $\mathbb{E}\|\hat{G}\|_2^2$ :

$$\begin{aligned}
 \sum_{n=1}^H q(n) \left\| \frac{\Delta_n}{q_n} \right\|_2^2 &= \sum_{n=1}^H q(n) \frac{\|\Delta_n\|_2^2}{q_n^2} \\
 &= Z \sum_{n=1}^H \bar{q}(n) \frac{\|\Delta_n\|_2^2}{\bar{q}_n^2} \\
 &\leq Z c_\psi^2 \sum_{n=1}^H \bar{q}(n) \frac{n^{2p+1}}{n^{2p}} \\
 &= Z c_\psi^2 \sum_{n=1}^H \frac{n^{2p+1}}{n^{3p+\frac{1}{2}}} \\
 &= Z c_\psi^2 \sum_{n=1}^H \frac{1}{n^{p-\frac{1}{2}}} \\
 &= Z c_\psi^2 \mathbf{H}_H^{p-\frac{1}{2}} \\
 &= c_\psi^2 \mathbf{H}_H^{p-\frac{1}{2}} \mathbf{H}_H^{p+\frac{1}{2}} \\
 &\leq c_\psi^2 (\mathbf{H}_H^{p-\frac{1}{2}})^2
 \end{aligned}$$

Now inspect the expected compute,  $\mathbb{E}_{n \sim q} n$ :

$$\begin{aligned}
 \mathbb{E}_{n \sim q} &= \sum_{n=1}^H q(n) n \\
 &= Z \sum_{n=1}^H \frac{n}{n^{p+\frac{1}{2}}} \\
 &= Z \sum_{n=1}^H \frac{1}{n^{p-\frac{1}{2}}} \\
 &= Z \mathbf{H}_H^{p-\frac{1}{2}} \\
 &= \mathbf{H}_H^{p-\frac{1}{2}} \mathbf{H}_H^{p+\frac{1}{2}} \\
 &\leq (\mathbf{H}_H^{p-\frac{1}{2}})^2
 \end{aligned}$$

□

### B.2.2. THEOREM 4.2

**Bounded variance and compute with geometric convergence of  $\psi$ .** Assume  $\psi_n$  converges according to  $\psi_n \leq cp^n$ , or faster, for  $0 < p < 1$ . Choose RT-SS and with  $q(n) \propto p^n$ . The resulting estimator  $\hat{G}$  achieves expected compute  $C \leq (1-p)^{-2}$  and expected squared norm  $\|\hat{G}\|_2^2 \leq \frac{c}{(1-p)^2} := \tilde{G}^2$ . Thus, the estimator achieves horizon-agnostic variance and expected compute bounds for all  $0 < p < 1$ .

*Proof.* Let  $q(n) = \frac{\bar{q}(n)}{Z}$ , for  $\bar{q}(n) = p^n$ . Note  $Z = \sum_{n=1}^H p^n = p \frac{1-p^H}{1-p} \leq \frac{1}{1-p}$ . Now, note  $\psi_n = c_\psi \bar{q}(n)$ . It follows

$$\begin{aligned} \mathbb{E}_{n \sim q} \left\| \frac{\Delta_n}{q(n)} \right\|_2^2 &= \sum_{n=1}^H q(n) \frac{\|\Delta_n\|_2^2}{q(n)^2} \\ &\leq \sum_{n=1}^H q(n) \frac{\psi_n^2}{q(n)^2} \\ &= \leq c_\psi^2 \sum_{n=1}^H q(n) \frac{\bar{q}(n)^2}{q(n)^2} \\ &= c_\psi^2 Z^2 \sum_{n=1}^H q(n) \\ &= c_\psi^2 Z^2 \end{aligned}$$

Now consider the expected compute. We have

$$\begin{aligned} \mathbb{E}_{n \sim q} n &= \sum_{n=1}^N n q(n) \\ &= \sum_{n=1}^N \frac{np^n}{Z} \\ &= \frac{1}{Z} \sum_{n=1}^N np^n \\ &= p \frac{1 + Hp^{H+1} - (H+1)p^H}{(1-p)^2} \\ &= \frac{1 + Hp^{H+1} - (H+1)p^H}{(1-p)(1-p^H)} \\ &\leq \frac{1}{(1-p)(1-p^H)} \\ &\leq \frac{1}{(1-p)^2} \end{aligned}$$

□

### B.2.3. THEOREM 4.3

**Asymptotic regret bounds for optimizing infinite-horizon programs.** Assume the setting from 4.1 or 4.2, and the corresponding  $C$  and  $\tilde{G}$  from those theorems. Let  $R_t$  be the instantaneous regret at the  $t$ th step of optimization,  $R_t = \mathcal{L}(\theta_t) - \min_\theta \mathcal{L}(\theta)$ . Let  $t(B)$  be the greatest  $t$  such that a computational budget  $B$  is not exceeded. Use online gradient descent with step size  $\eta_t = \frac{D}{\sqrt{t \mathbb{E}[\|\hat{G}\|_2^2]}}$ . As  $B \rightarrow \infty$ , the asymptotic instantaneous regret is bounded by  $R_{t(B)} \leq \mathcal{O}(\tilde{G}D\sqrt{\frac{C}{B}})$ , independent of  $H$ .

*Proof.* First, we control  $t(B)$  using the central limit theorem. Note  $t \rightarrow \infty \iff B(t) \rightarrow \infty$ . Consider  $B$  as a function  $B(t)$  of  $t$ . We have  $B(t) = \sum_{\tau=1}^t N_\tau$ , where  $N \sim q$ . Thus,  $\frac{B(t)}{t} \rightarrow \mathbb{E}_{N \sim q} N$  by the central limit theorem. This implies that in the limit,  $t = \frac{B}{C}$ .

To complete the proof, plug in  $t(B)$  and  $\eta_t$ , as well as the upper bound on squared norm  $\mathbb{E}\|\hat{G}\|_2^2 \leq \tilde{G}^2$  and upper bound on diameter  $D$ , into standard results for stochastic gradient descent with convex loss functions (e.g. section 3.4 in (Hazan et al., 2016))

□

### B.3. Proofs for section 5

#### B.3.1. THEOREM 5.1

**Optimality of RT-SS under adversarial correlation.** Consider the family of estimators presented in Equation 2. Assume  $\theta$ ,  $\nabla_\theta$ , and  $G$  are univariate. For any fixed sampling distribution  $q$ , the single-sample RT estimator RT-SS minimizes the worst-case variance of  $\hat{G}$  across an adversarial choice of covariances  $\text{Cov}(\Delta_i, \Delta_j) \leq \sqrt{\text{Var}(\Delta_i)}\sqrt{\text{Var}(\Delta_j)}$ .

*Proof.* Recall  $\hat{G} = \sum_{n=0}^N \Delta_n W(n, N)$ . Let  $\sigma_{i,j}^2 = \text{Cov}(\Delta_i, \Delta_j)$  and  $\sigma_i^2 = \text{Var}(\Delta_i)$ . The variance of  $\hat{G}$  is:

$$\begin{aligned} \text{Var}(\hat{G}) &= \sum_N q(N) \left[ \sum_{i=0}^N \sum_{j=0}^N W(i, N) W(j, N) \sigma_{i,j}^2 \right] \\ &\leq \sum_N q(N) \left[ \sum_{i=0}^N \sum_{j=0}^N W(i, N) W(j, N) \sigma_i \sigma_j \right] \\ &= \sum_N q(N) \left( \sum_{n=0}^N W(n, N) \sigma_n \right)^2 \end{aligned}$$

Note the above bound is tight as the adversary can choose  $\text{Cov}(\Delta_i, \Delta_j) = \sigma_i \sigma_j$ . Introduce  $\rho(n, N) = W(n, N)q(N)$ , and note that the constraint from proposition 2.1 can equivalently be stated as  $\sum_{N \geq n} \rho(n, N) = 1 \forall n$ . We have the variance:

$$\text{Var}(\hat{G}|N) \leq \sum_N \frac{1}{q(N)} \left( \sum_{n=0}^N \rho(n, N) \sigma_n \right)^2$$

Consider finding  $\rho(n, N)$  which minimizes the variance for an arbitrary  $q$ . The constrained optimization has the Lagrangian:

$$J = \left( \sum_N \frac{1}{q(N)} \left( \sum_{n=0}^N \rho(n, N) \sigma_n \right)^2 \right) + \sum_n \lambda_n \left( \sum_{N \geq n} \rho(n, N) - 1 \right)$$

We can accordingly optimize by taking derivatives:

$$\begin{aligned} \frac{dJ}{d\rho(n, N)} &= 2Cq(N) \left( \sum_{i=0}^N w(i, N) \sigma_i \right) \sigma_n + \lambda_n \\ \frac{dJ}{d\rho(n, N)} = 0 &\implies \sigma_n q(N) \sum_{i=0}^N w(i, N) \sigma_i = k_n \\ &\implies \sigma_n \sum_{i=0}^N \rho(i, N) \sigma_i = k_n \forall N \geq n \\ &\implies \rho(n, N) = 0 \forall N > n \end{aligned}$$

□

#### B.3.2. THEOREM 5.2

**Optimal  $q$  under adversarial correlation.** Consider the family of estimators presented in Equation 2. Assume  $\text{Cov}(\Delta_i, \Delta_i)$  and  $\text{Cov}(\Delta_i, \Delta_j)$  are diagonal. The RT-SS estimator with  $q_n \propto \sqrt{\frac{\mathbb{E}[\|\Delta_n\|_2^2]}{C(n)}}$  maximizes the ROE across an adversarial choice of diagonal covariance matrices  $\text{Cov}(\Delta_i, \Delta_j)_{kk} \leq \sqrt{\text{Cov}(\Delta_i, \Delta_i)_{kk} \text{Cov}(\Delta_j, \Delta_j)_{kk}}$ .

*Proof.* First, note that by the assumption of diagonal covariance between all terms, the expected squared norm decomposes over indices  $k$ :

$$\mathbb{E}[\|\hat{G}\|_2^2] = \sum_k \mathbb{E}[\hat{G}[k]^2]$$

For all choices of  $q$ , the RT-SS estimator minimizes the worst-case variance and thus (due to unbiasedness) the expected squared value of each entry in  $\hat{G}$ . Because the squared norm decomposes, the RT-SS estimator minimizes the squared norm for all  $q$ .

It remains to optimize  $q$ . We know  $\rho(n, N) = 0 \forall N > n$ . Therefore to satisfy the constraint, we have  $\rho(N, N) = 1$ . It follows that:

$$\text{ROE}^{-1} = \left( \sum_N q(N)C(N) \right) \left( \sum_N \frac{\mathbb{E}\|\Delta_N\|_2^2}{q(N)} \right)$$

We require  $\sum_N q(N) = 1$ . The constrained optimization has the Lagrangian:

$$J = \left( \sum_N q(N)C(N) \right) \left( \sum_N \frac{\mathbb{E}\|\Delta_N\|_2^2}{q(N)} \right) + \lambda \left( \sum_N q(N) - 1 \right)$$

Let  $C = \left( \sum_N q(N)C(N) \right)$  and  $V = \left( \sum_N \frac{\mathbb{E}\|\Delta_N\|_2^2}{q(N)} \right)$ . We optimize  $q(N)$  by taking the derivative of the inverse ROE:

$$\begin{aligned} \frac{d\text{ROE}^{-1}}{dq(N)} &= C(N)V - C \frac{\sigma_N^2}{q(N)^2} \\ \frac{d\text{ROE}^{-1}}{dq(N)} = 0 &\implies q(N)^2 \propto \frac{\mathbb{E}\|\Delta_N\|_2^2 C}{C(N)V} \\ &\implies q(N) \propto \sqrt{\frac{\mathbb{E}\|\Delta_N\|_2^2}{C(N)}} \end{aligned}$$

□

### B.3.3. THEOREM 5.3

**Optimality of RT-RR under independence.** Consider the family of estimators presented in Eq. 2. Assume the  $\Delta_j$  are univariate. When the  $\Delta_j$  are uncorrelated, for any importance sampling distribution  $q$ , the Russian roulette estimator achieves the minimum variance in this family and thus maximizes the optimization efficiency lower bound.

*Proof.* By independence, we have  $\mathbb{E}(\sum_n W(n, N)\Delta_n)^2 = \sum_n W(n, N)^2 \mathbb{E}\Delta_n^2$ . It follows that an RT estimator has variance:

$$\begin{aligned} \text{Var}(\hat{G}) &= \sum_N q(N) \sum_{n \leq N} W(n, N)^2 \mathbb{E}\Delta_n^2 \\ &= \sum_N \frac{1}{q(N)} \sum_{n \leq N} \rho(n, N)^2 \mathbb{E}\Delta_n^2 \end{aligned}$$

Recall the constraint in proposition 2.1 requires  $\sum_{N \geq n} \rho(n, N) = 1$  for all  $n$ . The Lagrangian of the constrained minimization of  $\text{Var}(\hat{G})$  with respect to  $\rho$  is:

$$J = \text{Var}(\hat{G}) + \sum_n \lambda_n \left( \sum_{N \geq n} \rho_n - 1 \right)$$

We optimize  $\rho$  by finding the minimum of the Lagrangian:

$$\begin{aligned} \frac{dJ}{d\rho(n, N)} &= \frac{2}{q(N)} \rho(n, N) \mathbb{E}\Delta_n^2 + \lambda_n \\ \frac{dJ}{d\rho(n, N)} = 0 &\implies \frac{\rho(n, N)}{q(N)} = -\frac{\lambda_n}{2\mathbb{E}\Delta_n^2} \\ &\implies W(n, N) = -\frac{\lambda_n}{2\mathbb{E}\Delta_n^2}, \text{ which is independent of } N \\ &\implies W(n, N) = \frac{1}{\sum_{N' \geq n} q(N')} \text{ to fulfill the constraint in proposition 2.1} \end{aligned}$$

□



## B.3.4. THEOREM 5.4

**Optimal  $q$  under independence.** Consider the family of estimators presented in Equation 2. Assume  $\text{Cov}(\Delta_i, \Delta_i)$  is diagonal and  $\Delta_i$  and  $\Delta_j$  are independent. The RT-RR estimator with  $Q(i) \propto \sqrt{\frac{\mathbb{E}\|\Delta_i\|_2^2}{C(i)-C(i-1)}}$ , where  $Q(i) = \Pr(n \geq i) = \sum_{j=i}^H q(j)$ , maximizes the ROE.

*Proof.* First note that by theorem 5.3, for any  $q$  and for each element in the vector  $\hat{G}$ , the RT-RR estimator minimizes the variance of that element. Now note that due to independence of  $\Delta_i, \Delta_j$  and diagonality of  $\text{Cov}(\Delta_i, \Delta_i)$ :

$$\begin{aligned} \mathbb{E}\left\|\sum_{n=1}^N W(n, N)\Delta_n\right\|_2^2 &= \sum_{n=1}^N W(n, N)\mathbb{E}\|\Delta_n\|_2^2 \\ &= \sum_k \sum_{n=1}^N W(n, N)\mathbb{E}\Delta_n[k]^2 &= \sum_k \mathbb{E}\hat{G}[k]^2 \end{aligned}$$

As the RT-RR estimator minimizes  $\mathbb{E}\hat{G}[k]^2$  for each coordinate  $k$ , it also minimizes  $\mathbb{E}\|\hat{G}\|_2^2$ . It remains to optimize  $Q$ . Consider the inverse ROE of the RT-RR estimator. By independence we have:

$$\text{ROE}(\hat{G})^{-1} = \mathbb{E}\|\hat{G}\|_2^2 \mathbb{E}C = \left( \sum_N q(N) \sum_{n \leq N} \frac{1}{Q(n)^2} \mathbb{E}\|\Delta_n\|_2^2 \right) \left( \sum_N q(N) C(N) \right)$$

Take the gradient of the inverse optimization efficiency lower bound w.r.t.  $q(n)$ :

$$\frac{d\text{ROE}(\hat{G})^{-1}}{dq(N)} = C(N)\mathbb{E}\|\hat{G}\|_2^2 + \sum_{n \leq N} \frac{1}{Q(n)^2} \mathbb{E}\|\Delta_n\|_2^2 - \sum_i q(i) \sum_{j \leq \min(i, N)} \frac{2}{Q(j)^3} \mathbb{E}\|\Delta_j\|_2^2$$

$$\begin{aligned} \sum_i q(i) \sum_{j \leq \min(i, N)} \frac{2}{Q(j)^3} \mathbb{E}\|\Delta_j\|_2^2 &= \sum_{j \leq N} \frac{2}{Q(j)^2} \mathbb{E}\|\Delta_j\|_2^2 \frac{\sum_i q(i) \mathbb{1}\{i \geq j\}}{Q(j)} \\ &= \sum_{j \leq N} \frac{2}{Q(j)^2} \mathbb{E}\|\Delta_j\|_2^2 \quad \text{by definition of } Q(j) \end{aligned}$$

$$\implies \frac{d\text{ROE}(\hat{G})^{-1}}{dq(N)} = C(N)\mathbb{E}\|\hat{G}\|_2^2 - \sum_{n \leq N} \frac{1}{Q(n)^2} \mathbb{E}\|\Delta_n\|_2^2$$

Now optimize the objective w.r.t.  $Q$  by finding the critical point:

$$\begin{aligned} \frac{d\text{ROE}(\hat{G})^{-1}}{dq(N)} = 0 &\implies C(N)\mathbb{E}\|\hat{G}\|_2^2 = \sum_{n \leq N} \frac{1}{Q(n)^2} \mathbb{E}\|\Delta_n\|_2^2 \\ &\implies \mathbb{E}\|\hat{G}\|_2^2 (C(N) - C(N-1)) = \frac{1}{2} \frac{\mathbb{E}\|\Delta_N\|_2^2}{Q(N)^2} \\ &\implies Q(N)^2 \propto \frac{\mathbb{E}\|\Delta_n\|_2^2}{C(N) - C(N-1)} \end{aligned}$$

□
